# Supplementary material for: Munc13-1 and Munc18-1 together prevent NSF-dependent de-priming of synaptic vesicles
Source: PubMed Central journal article supplement (PMC5482055; doi:10.1038/ncomms15915), 2017-06-21
Supplement: ncomms15915-s1.pdf [file ncomms15915-s1.pdf]

Type of file: PDF

Size of file: 0 KB

Title of file for HTML: Supplementary Information

Description: Supplementary Figures and Supplementary Table.

Type of file: PDF

Size of file: 0 KB

Title of file for HTML: Peer Review File

Description:

## Supplementary Figure. 1

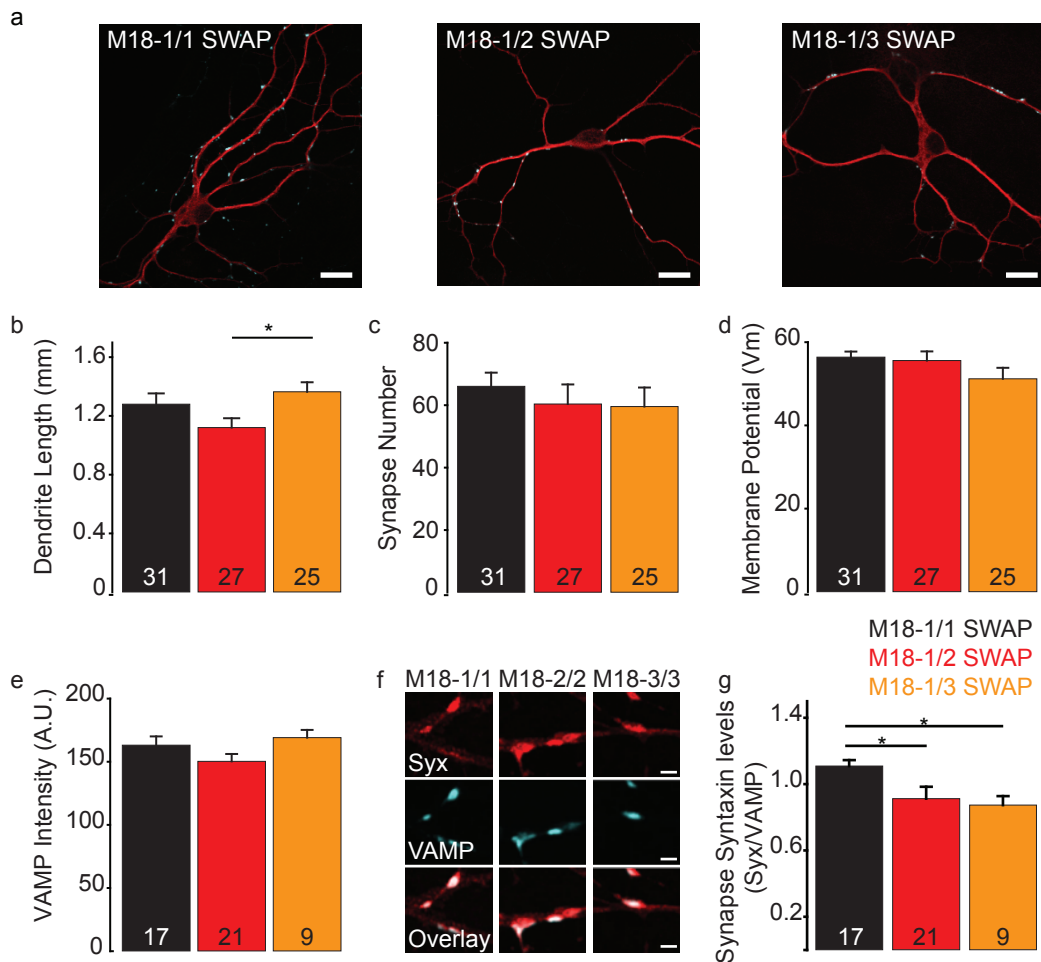

### Supplementary Figure1

#### Viral expression of Munc18-2 or -3 rescues munc18-1 null mutant neurons and restores neuronal viability and morphology

(a) Typical examples of null mutant neurons infected with M18-1, -2, -3 viral particles at DIV1 and stained for MAP2 (dendritic maker) and synapsin (presynaptic terminal marker) at DIV14. Scale bar represents 50  $\mu$ m.

(b, c) Total dendrite length (b, synapse number (c) and membrane potential (d) of autaptic null mutant neurons expressing M18-1, -2, -3.

(e, f, g) VAMP/synaptobrevin expression level (e), example of syntaxin and VAMP co-staining (f) and syntaxin levels compared to VAMP in autaptic null mutant neurons expressing M18-1, -2, -3. Scale bar represents 2  $\mu$ m.

All data in this figure are means  $\pm$  SEMs; \* $p$  < 0.05, \*\* $p$  < 0.01, \*\*\* $p$  < 0.001 as determined by ANOVA. See Table S1 for all values, SEMs and n-numbers plotted in this figure.

# Supplementary Figure. 2

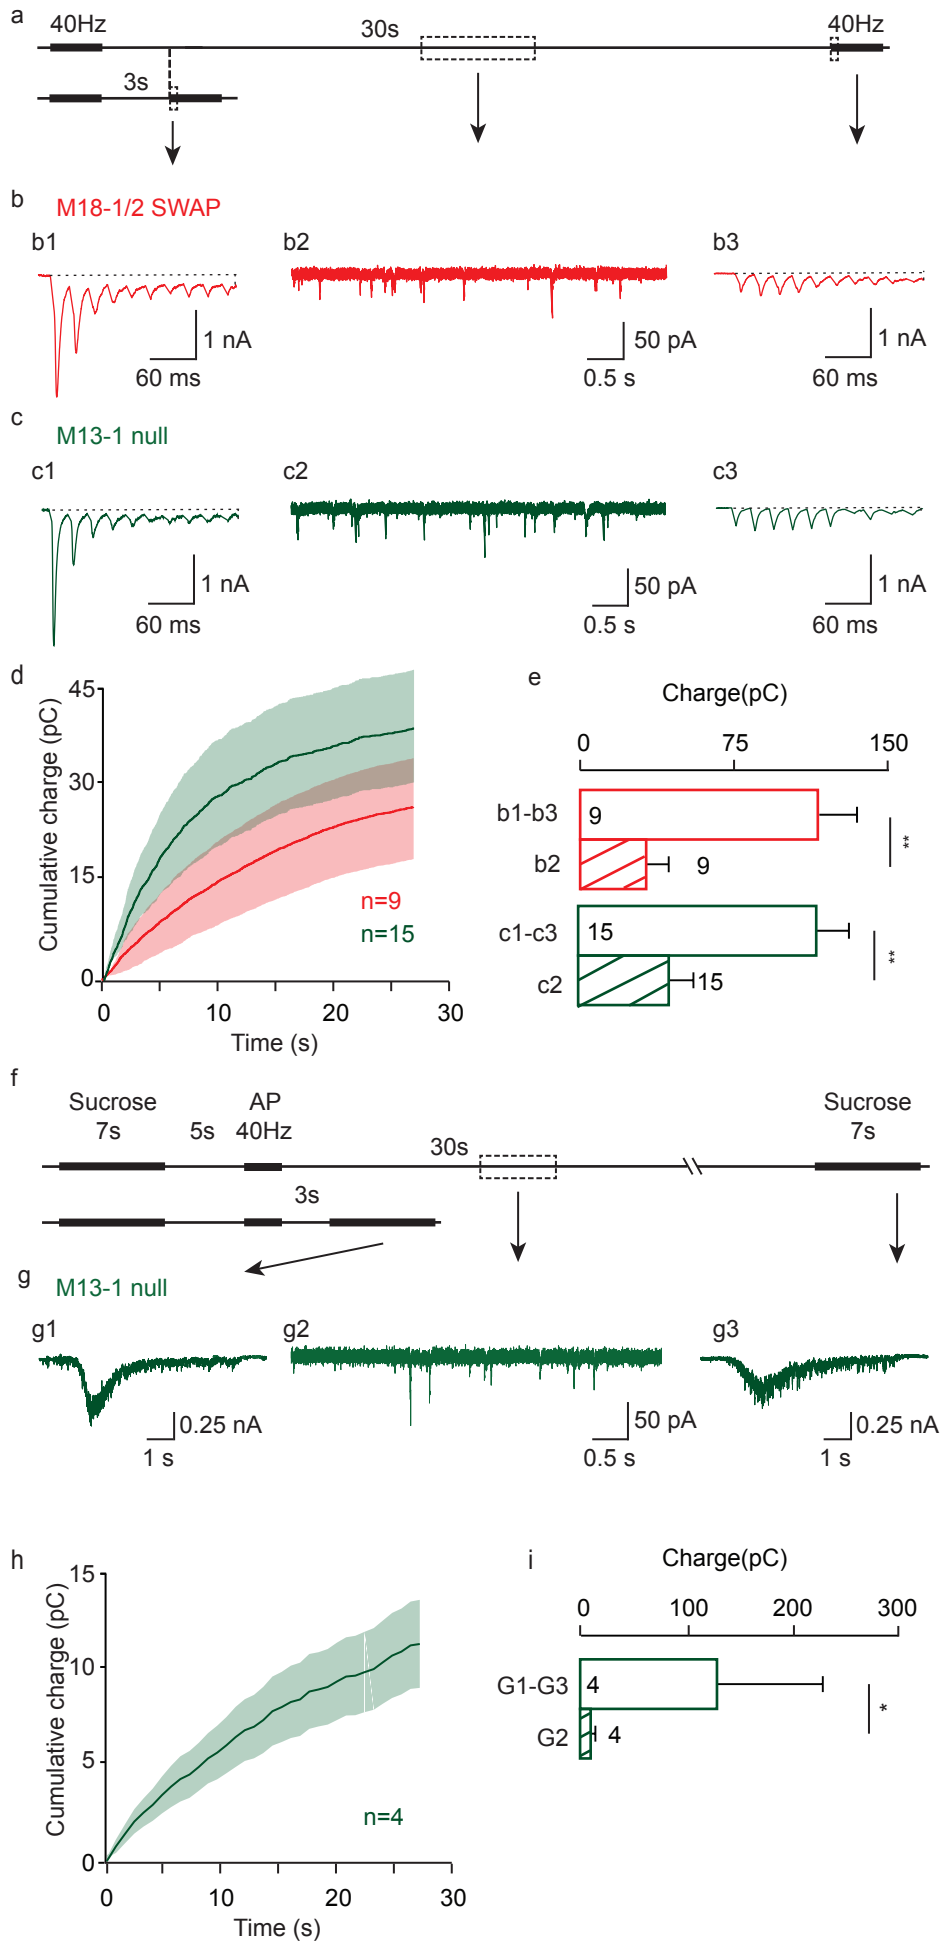

## Supplementary Figure2

### Primed vesicles rapidly de-prime in the absence of Munc13-1

(a) Paradigm to assess de-priming by dual 40Hz train stimulation (see methods for details).

(b, c) sample traces of dual 100 stimuli at 40Hz with 3s or 30s interval in *munc18-1/2SWAP* (b) and *munc13-1 null* (c) synapses.

(d) Spontaneous fusion events were quantified for the 3-30s intervals.

(e) To quantify de-priming, the total charge of the first 10 responses (b1, b3; c1, c3) of each dual 100 stimuli at 40Hz was quantified. The spontaneous fusion of vesicles in the 3-30s intervals (b2; c2) cannot explain the loss of fusion-competent vesicles after 30s, defined as the difference in total charge between 3s and 30s intervals (b1-b3; c1-c3).

(f) Paradigm to assess de-priming by dual 500 mM hypertonic sucrose application.

(g) Sample traces of dual sucrose application with 3s or 30s interval in *munc13-1 null* synapses. (h) Spontaneous fusion events were quantified for the 3-30s intervals.

(h) Spontaneous fusion events were quantified for the 3 - 30s intervals.

(i) To quantify de-priming, the total charge of the sucrose responses (g1, g3) after 100 stimuli at 40Hz was quantified. The spontaneous vesicle fusion in the 3-30s intervals (g2) cannot explain the loss of fusion-competent vesicles after 30s, defined as the difference in total charge between 3s and 30s intervals (g1-g3).

All data in this figure are means  $\pm$  SEMs; p value determined by Wilcoxon signed rank test. See supplementary Table 1 for all values, SEMs and n-numbers plotted in this figure.

## Supplementary Figure. 3

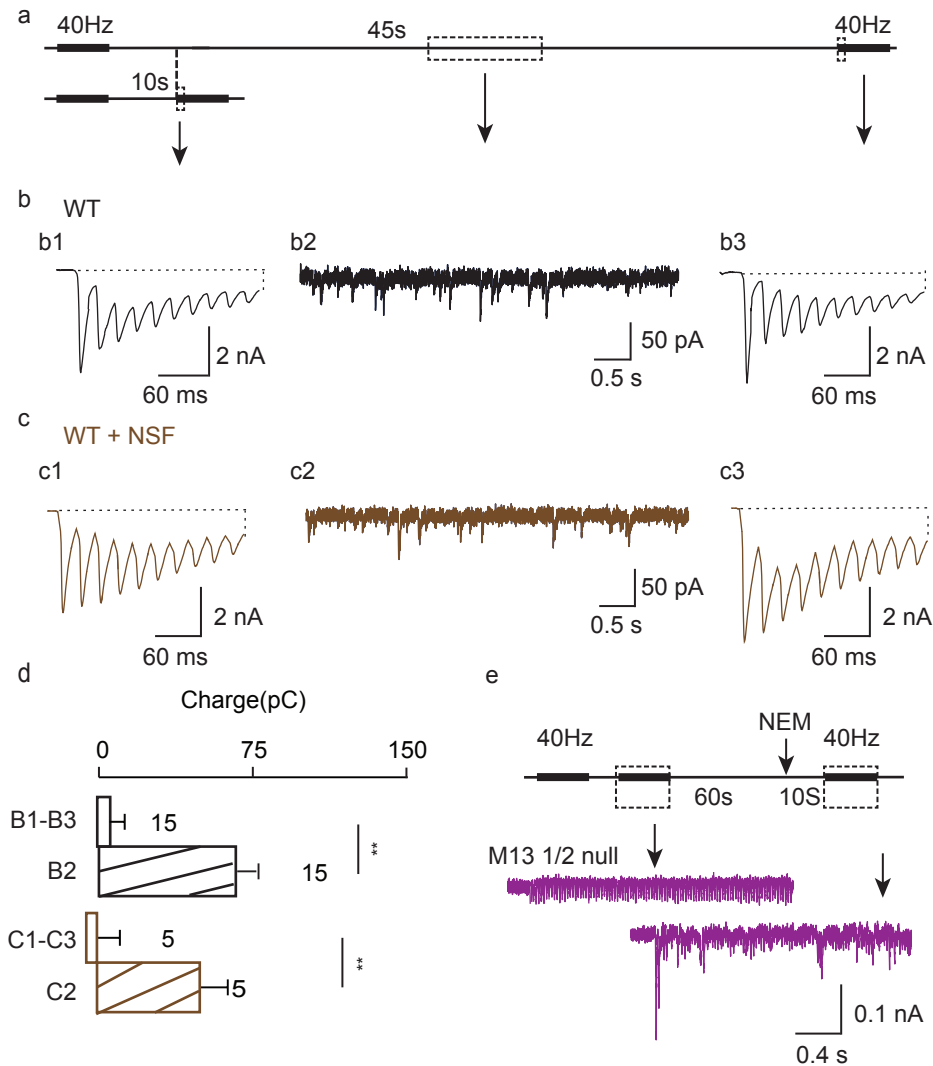

### Supplementary Figure3 de-priming is undetected in the WT and NSF over-expressed WT neurons

- (a) Paradigm to assess de-priming by dual 40Hz train stimulation (see methods for details).
- (b, c) sample traces of dual 100 stimuli at 40Hz with 10s or 45s interval in WT (b) and NSF over-expressed WT (c) synapses.
- (d) To quantify de-priming, the total charge of the first 10 responses (b1, b3; c1, c3) of each dual 100 stimuli at 40Hz was quantified. The spontaneous fusion of vesicles in the 10-45s intervals (b2; c2) cannot explain the loss of fusion-competent vesicles after 45s, defined as the difference in total charge between 10s and 45s intervals (b1-b3; c1-c3).
- (e) Paradigm and sample traces of munc13-1/2 null with train stimulation and NEM application.
- All data in this figure are means  $\pm$  SEMs; p value determined by Wilcoxon signed rank test. See Table S1 for all values, SEMs and n-numbers plotted in this figure.

## Supplementary Figure. 4

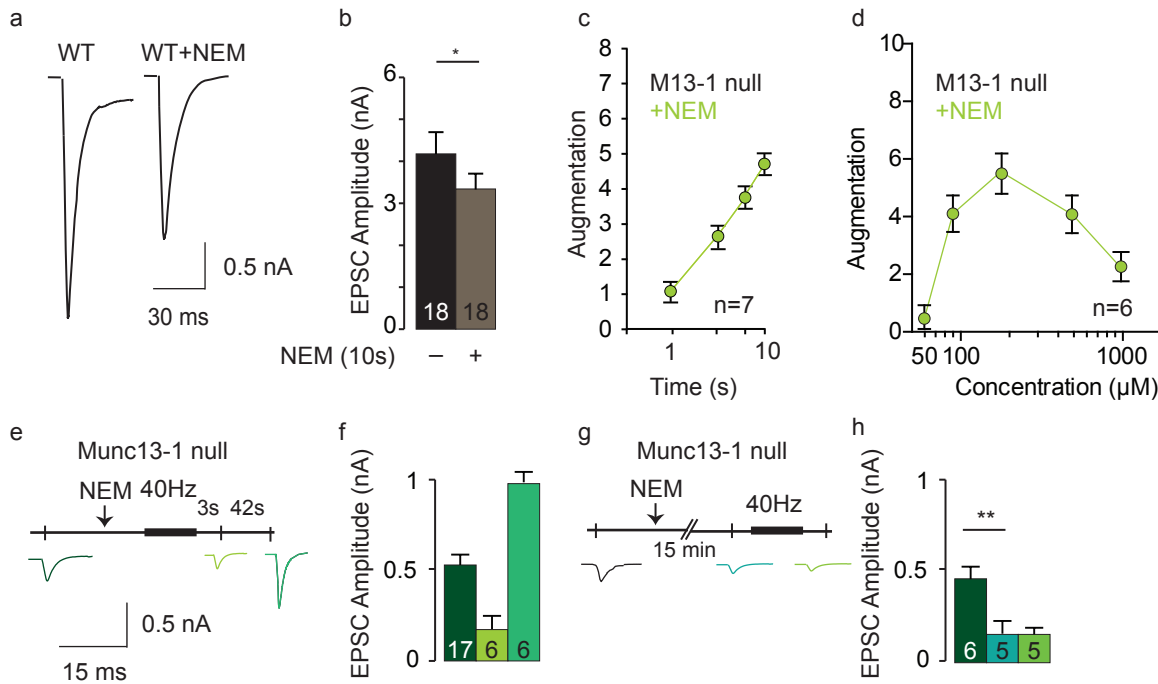

## Supplementary Figure 4

### NEM effect on evoked EPSC in WT and munc13-1 null autaptic neurons

(a, b) Sample traces (a) and quantification (b) of EPSCs with or without 10 s NEM application.

(c) The effect of NEM on munc13-1 null neurons EPSC builds up during the 1<sup>st</sup> second after application and reaches highest level within 10s.

(d) NEM potentiates EPSC in a dose-dependent manner.

(e, f) After NEM application, EPSC potentiation recovered in 45 second after 100 stimuli with 40Hz; Paradigm and sample trace (e), and quantification (f).

(g, h) After NEM application, EPSC potentiation vanished after 15 min; 100 stimuli at 40Hz cannot re-potentiate EPSC ; Paradigm and sample trace (g), and quantification (h).

p values determined by paired t-test. See Table S1 for all values, SEMs and n-numbers plotted in this figure.

## Supplementary Figure. 5

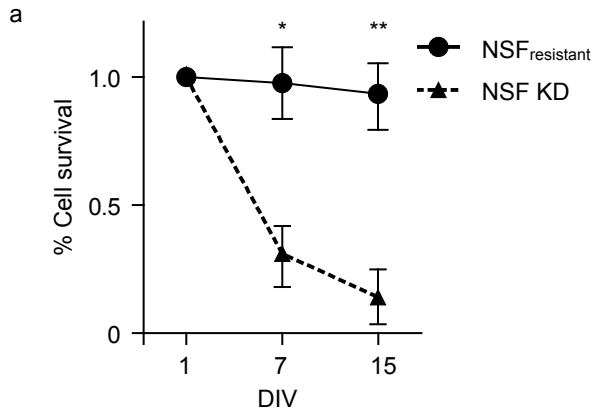

### Supplementary Figure 5 NSF knock down by shRNA causes neuronal death

(a) Neuron viability was measured at various time after infection at DIV0. Black circle: neurons with NSF knock down by short hairpins and rescued by shRNA resistant NSF (n=10); Black triangle: neurons with NSF knock down by short hairpins only (n=10). All data in this figure are means  $\pm$  SEMs;

\* $p < 0.05$ , \*\* $p < 0.01$ , \*\*\* $p < 0.001$  as determined by student t-test.

**Supplementary Table 1**

|                                                                   | M18 -1/1SWAP                                      | M18 -1/2SWAP                                             | M18 -1/3SWAP                                     | M13 -1 null                                               | CAPS -1/2 null                                         | M13 -1/2 null                                      | WT                                           |
|-------------------------------------------------------------------|---------------------------------------------------|----------------------------------------------------------|--------------------------------------------------|-----------------------------------------------------------|--------------------------------------------------------|----------------------------------------------------|----------------------------------------------|
| <i>number of docked vesicles</i>                                  | 6.38±0.26, n=56, fig.1G                           | 4.6±0.26, n=54, fig.1G                                   | 2.69±0.23, n=65, fig.1G                          |                                                           |                                                        |                                                    |                                              |
| <i>active zone size</i>                                           | 284.5±15.9 nm, n=56, fig.1H                       | 283.6±17.9 nm, n=54, fig.1H                              | 312.9±16.3 nm, n=65, fig.1H                      |                                                           |                                                        |                                                    |                                              |
| <i>total number of vesicles</i>                                   | 79.3±4.7, n=56, fig.1I                            | 72.4±5.2, n=54, fig.1I                                   | 72.8±4.8, n=65, fig.1I                           |                                                           |                                                        |                                                    |                                              |
| <i>EPSC amplitude</i>                                             | 3.7±0.1 nA, n=73, fig.1B<br>3.1±0.3 nA, n=9, *    | 0.42±0.07 nA, n=90, fig.1B<br>0.36±0.13 nA, n=48, fig.3F | 0.1±0.02 nA, n=49, fig.1<br>0.07±0.03 nA, n=6, * | 0.4±0.08 nA, n=119, fig.3B<br>0.51±0.14 nA, n=6, s fig.3F | 0.75±0.19 nA, n=68, fig.3H<br>3.4±0.3 nA, n=68, fig.3H | 0.003±0.003 nA, n=5, fig.3K<br>3.8±0.3 nA, n=51, * | 4.1±0.8 nA, n=18, s fig.3B                   |
| <i>EPSC amplitude after 40 Hz</i>                                 |                                                   | 1.8±0.3 nA, n=48, fig.3F                                 |                                                  | 2.1±0.1 nA, n=119, fig.3B                                 | 3.4±0.3 nA, n=68, fig.3H                               |                                                    | 3.4±0.5 nA, n=51, *                          |
| <i>EPSC amplitude in presence of 100 μM NEM &lt;10s</i>           | 2.7±0.3 nA, n=10, *                               | 2.2±0.2 nA, n=23, fig.3F                                 | 0.07±0.03 nA, n=6, *                             | 2.0±0.2 nA, n=41, fig.3B                                  | 0.71±0.24 nA, n=17, fig.3H                             | 0.15±0.07 nA, n=19, fig.3K                         | 3.3±0.6 nA, n=18, s fig.3B                   |
| <i>EPSC amplitude in presence of 100 μM NEM &gt;15min</i>         |                                                   |                                                          |                                                  | 0.6±0.1 nA, n=6, s fig.3F                                 |                                                        |                                                    | 0.2±0.05 nA, n=5, *                          |
| <i>mEPSC amplitude</i>                                            | 25.4±2.0 pA, n=51, fig.1E<br>21.3±2.5 pA, n=15, * | 21.7±2.2 pA, n=68, fig.1E<br>18.9±3.4 pA, n=20, *        | 19.1±0.9 pA, n=27, fig.1E                        | 26.1±2.8 pA, n=29, fig.3D                                 | 23.8±3.1 pA, n=17, *                                   |                                                    | 22.4±5.1 pA, n=35, *<br>29.1±6.9 pA, n=16, * |
| <i>mEPSC amplitude in presence of 100 μM NEM &lt;10s</i>          | 24.5±6.2 pA, n=15, *                              | 20±5.5 pA, n=20, *                                       |                                                  | 25.4±3.2 pA, n=29, fig.3D                                 | 20.1±2.7 pA, n=17, *                                   |                                                    | 27.6±7.2 pA, n=16, *                         |
| <i>mEPSC frequency</i>                                            | 17±1.6 Hz, n=51, fig.1D<br>16.5±4.1 Hz, n=15, *   | 2.1±0.9 Hz, n=68, fig.1D<br>2.9±1.2 Hz, n=20, *          | 0.1±0.04 Hz, n=27, fig.1D                        | 1.6±0.4 Hz, n=29, fig.3D                                  | 2.1±0.7 Hz, n=17, *                                    |                                                    | 10.3±4.6 Hz, n=35, *<br>8.7±3.9 Hz, n=16, *  |
| <i>mEPSC frequency in presence of 100 μM NEM &lt;10s</i>          | 12.9±3.3 Hz, n=15, *                              | 7.1±1.5 Hz, n=20, *                                      |                                                  | 4.6±0.6 Hz, n=29, fig.3D                                  | 1.2±0.4 Hz, n=17, *                                    |                                                    | 6.1±2.4 Hz, n=16, *                          |
| <i>mEPSC charge in 45s-10s</i>                                    |                                                   | 23.9±3.4 pC, n=30, fig.2                                 |                                                  | 20.4±2.8 pC, n=47, fig.2                                  |                                                        |                                                    |                                              |
| <i>first 10 EPSCs charge in second 40 Hz train (45s interval)</i> |                                                   | 51.8±9.0 pC, n=30, fig.2                                 |                                                  | 83.2±8.4 pC, n=47, fig.2                                  |                                                        |                                                    |                                              |
| <i>first 10 EPSCs charge in second 40 Hz train (10s interval)</i> |                                                   | 126.4±11.4 pC, n=30, fig.2                               |                                                  | 158.5±15.4 pC, n=47, fig.2                                |                                                        |                                                    |                                              |
| <i>mEPSC charge in 30s-3s</i>                                     |                                                   | 27.9±8.4 pC, n=9, s fig.2                                |                                                  | 36.1±9.1 pC, n=15, s fig.2                                |                                                        |                                                    |                                              |
| <i>first 10 EPSCs charge in second 40 Hz train (30s interval)</i> |                                                   | 49.2±11.6 pC, n=9, s fig.2                               |                                                  | 105.2±12.5 pC, n=15, s fig.2                              |                                                        |                                                    |                                              |
| <i>first 10 EPSCs charge in second 40 Hz train (3s interval)</i>  |                                                   | 155.1±18.8 pC, n=9, s fig.2                              |                                                  | 199.5±22.7 pC, n=15, s fig.2                              |                                                        |                                                    |                                              |
| <i>mEPSC charge in 30s-3s</i>                                     |                                                   |                                                          |                                                  | 11.7±2.8 pC, n=4, s fig.2                                 |                                                        |                                                    |                                              |
| <i>sucrose charge after 40 Hz train (30s interval)</i>            |                                                   |                                                          |                                                  | 289.9±42.1 pC, n=4, s fig.2                               |                                                        |                                                    |                                              |
| <i>sucrose charge after 40 Hz train (3s interval)</i>             |                                                   |                                                          |                                                  | 371.5±51.4 pC, n=4, s fig.2                               |                                                        |                                                    |                                              |

\* not shown in figures
